# Supplementary material for: Vegetation-mediated surface soil organic carbon formation and potential carbon loss risks in Dongting Lake floodplain, China
Source: Copernicus journal article supplement (doi:10.5194/egusphere-2025-2972), 2025-08-13
Supplement: Supplementary file 1 [file egusphere-2025-2972-supplement.pdf]

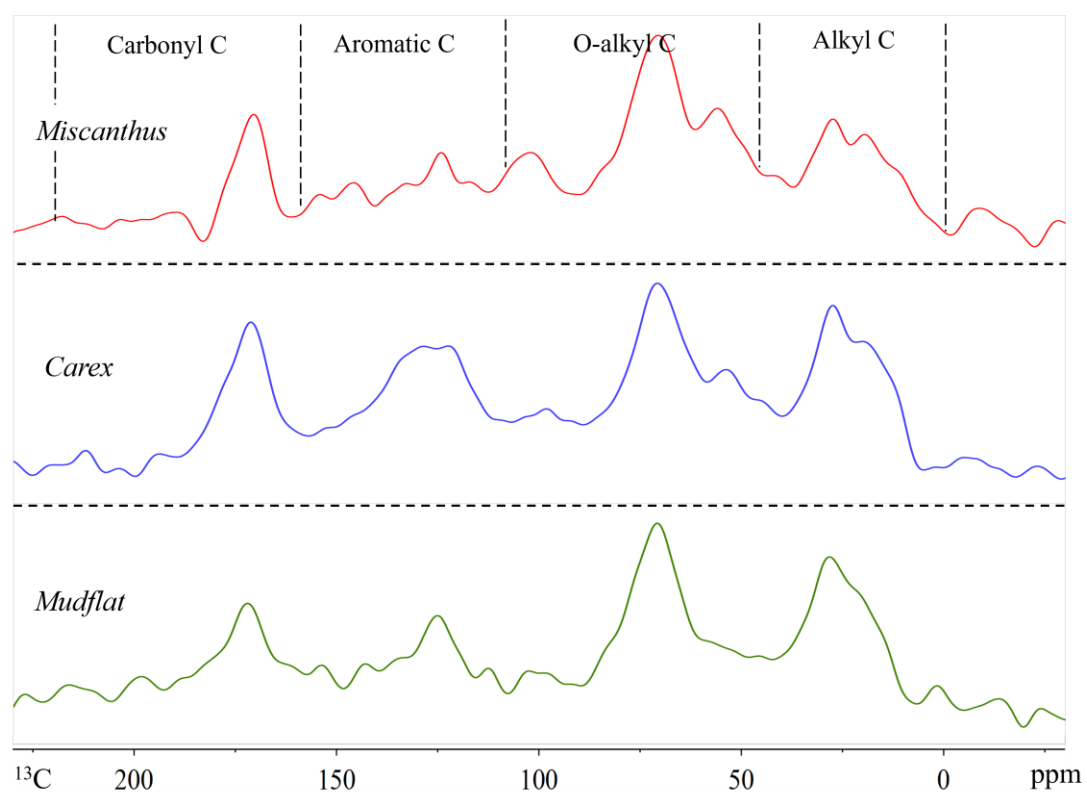

**Fig. S1** spectra of soil organic carbon acquired using  $^{13}\text{C}$  nuclear magnetic resonance of different community.
